1 **The Tudor protein Veneno assembles the ping-pong amplification complex that**  
2 **produces viral piRNAs in *Aedes* mosquitoes**

3 **Joep Joosten<sup>1</sup>, Pascal Miesen<sup>1</sup>, Bas Pennings<sup>1</sup>, Pascal W.T.C. Jansen<sup>2</sup>, Martijn A. Huynen<sup>3</sup>, Michiel**  
4 **Vermeulen<sup>2</sup>, and Ronald P. Van Rij<sup>1+</sup>**

5

6

7

8 <sup>1</sup>Department of Medical Microbiology, Radboud Institute for Molecular Life Sciences, Radboud University  
9 Medical Center, P.O. Box 9101, 6500 HB Nijmegen, The Netherlands

10 <sup>2</sup>Department of Molecular Biology, Faculty of Science, Radboud Institute for Molecular Life Sciences,  
11 Radboud University Nijmegen, P.O. Box 9101, 6500 HB Nijmegen, The Netherlands

12 <sup>3</sup>Centre for Molecular and Bioinformatics, Radboud Institute for Molecular Life Sciences, Radboud  
13 University Medical Center, P.O. Box 9101, 6500 HB Nijmegen, The Netherlands

14

15 + corresponding author: [ronald.vanrij@radboudumc.nl](mailto:ronald.vanrij@radboudumc.nl)

16

17

18 **Key words:** piRNA, PIWI protein, Tudor, Veneno, arbovirus, *Aedes aegypti*, Sindbis virus

19

20 **SUMMARY**

21 TUDOR-domain containing proteins facilitate PIWI interacting (pi)RNA biogenesis in *Drosophila*  
22 *melanogaster* and other model organisms. In *Aedes aegypti* mosquitoes, a somatically active piRNA  
23 pathway generates piRNAs from viral RNA during acute infection with cytoplasmic RNA viruses. Viral  
24 piRNA biogenesis requires ping-pong amplification by the PIWI proteins Ago3 and Piwi5. We  
25 hypothesized that Tudor proteins are required for viral piRNA production and performed a knockdown  
26 screen targeting all *Ae. aegypti* Tudor genes. Knockdown of several Tudor genes resulted in reduced viral  
27 piRNA levels, with silencing of AAEL012437 having the strongest effect. This protein, which we named  
28 Veneno, associates directly with Ago3 in an sDMA-dependent manner and localizes in cytoplasmic foci  
29 reminiscent of piRNA processing granules of *Drosophila*. Veneno-interactome analyses reveal a network  
30 of co-factors including the orthologs of the *Drosophila* piRNA pathway components Vasa and Yb, which  
31 in turn interacts directly with Piwi5. We propose that Veneno assembles a multi-protein complex for ping-  
32 pong dependent piRNA production from exogenous viral RNA.

## 33 INTRODUCTION

34 In animals, three distinct small RNA-mediated silencing pathways exist: the micro (mi)RNA, small  
35 interfering (si)RNA and PIWI-interacting (pi)RNA pathways<sup>1</sup>. In all three, a small RNA molecule provides  
36 sequence specificity to guide a member of the Argonaute protein family to target RNA. Whereas miRNAs  
37 and siRNAs associate with proteins of the AGO clade of this family, piRNAs are loaded onto PIWI clade  
38 proteins exclusively, forming piRNA induced silencing complexes (piRISCs)<sup>2</sup>.

39 The piRNA pathway is primarily known for its role in transgenerational protection of genome integrity by  
40 silencing transposable elements in the germline<sup>3,4</sup>. Despite ubiquitous expression of piRNAs across  
41 metazoans, our knowledge on the molecular mechanisms that govern the piRNA pathway is limited to only  
42 a small number of model organisms<sup>5</sup>. In the *Drosophila melanogaster* germline, single-stranded precursors  
43 are produced from genomic piRNA clusters that contain remnants of transposable elements<sup>6</sup>. These  
44 precursors leave the nucleus and are processed to give rise to a pool of primary piRNAs. The PIWI proteins  
45 Piwi and Aubergine (Aub) are preferentially loaded with such primary piRNAs that bear a uridine at the  
46 first nucleotide position (1U) and are generally antisense towards transposon mRNAs<sup>6-8</sup>. Upon loading with  
47 a piRNA, Piwi migrates to the nucleus to enforce transcriptional silencing, while Aub targets and cleaves  
48 cognate transposon RNA in an electron-dense perinuclear structure termed *nuage*<sup>3,9</sup>. The 3'-fragments that  
49 remain after Aub-cleavage are subsequently loaded onto the PIWI protein Ago3 and processed further into  
50 mature secondary piRNAs, which are primarily of sense orientation<sup>6,7</sup>. In turn, the resulting Ago3-piRISCs  
51 can target and cleave precursor transcripts to produce new antisense Aub-associated piRNAs, thus  
52 completing the so-called ping-pong amplification cycle. As Aub preferentially binds 1U piRNAs and  
53 cleaves target RNAs between nucleotides 10 and 11, Ago3-associated secondary piRNAs mostly have  
54 adenosine residues at their tenth nucleotide position (10A). The resulting 10 nt overlap of 5' ends and  
55 1U/10A nucleotide biases are hallmarks of piRNA production by the ping-pong amplification loop and are  
56 referred to as the ping-pong signature<sup>6,7</sup>. In addition to ping-pong amplification of piRNAs, Aub- and Ago3-  
57 mediated cleavage can induce phased production of downstream Piwi-associated piRNAs which have a  
58 strong 1U preference<sup>10,11</sup>.

59 Ping-pong amplification of piRNAs was previously thought to be restricted to germline tissues, but recently,  
60 ping-pong dependent piRNA production has been demonstrated in somatic tissues of several arthropods,  
61 among which hematophagous mosquitoes of the *Aedes* family<sup>12,13</sup>. These anthropophilic vector mosquitoes,  
62 primarily *Ae. aegypti* and *Ae. albopictus*, are crucial for the transmission of several arthropod-borne  
63 (arbo)viruses that cause debilitating diseases such as dengue, chikungunya and Zika<sup>14</sup>. Since arboviral  
64 infectivity is greatly affected by the ability of the virus to replicate in the vector, mosquito antiviral  
65 immunity is a key determinant for virus transmission. Intriguingly, while causing severe disease in

66 vertebrate hosts, arboviruses are able to replicate to high levels in the mosquito without apparent fitness  
67 cost to the insect<sup>15</sup>. An efficient immune response based on small interfering (si)RNAs is thought to  
68 contribute to this tolerance phenotype, as genetic interference with viral siRNA production causes elevated  
69 virus replication accompanied by increased mosquito mortality<sup>16-19</sup>.

70 In addition to siRNAs, arbovirus infection results in *de novo* production of virus-derived piRNAs  
71 (vpiRNAs) in aedine mosquitoes and cell lines, suggesting that two independent small RNA pathways  
72 contribute to antiviral immunity in these insects<sup>13</sup>. In *Ae. aegypti* cells, vpiRNAs from the alphavirus  
73 Sindbis virus (SINV) are predominantly produced in a ping-pong amplification loop involving the PIWI  
74 proteins Ago3 and Piwi5<sup>20</sup>. These proteins associate directly with vpiRNAs, which bear the distinct 1U/10A  
75 nucleotide signature indicative of ping-pong amplification. The further configuration of protein complexes  
76 responsible for vpiRNA biogenesis is currently unknown. Moreover, it is unclear whether vpiRNA  
77 production requires dedicated complexes that differ from those that mediate biogenesis of piRNAs from  
78 other substrates (e.g. transposons or host mRNAs).

79 Studies in *D. melanogaster* and other model organisms have shown that TUDOR domain-containing  
80 (Tudor) proteins serve important functions in piRNA biogenesis, including the prevention of non-specific  
81 degradation of piRNA substrates, facilitating PIWI protein interactions, and aiding in small RNA loading  
82 onto specific PIWI proteins<sup>3,4,21,22</sup>. TUDOR domains contain conserved motifs that are known to interact  
83 with symmetrically dimethylated arginines (sDMAs), a common post-translational modification on PIWI  
84 proteins<sup>23-25</sup>. Consequently, Tudor proteins may serve as adaptor molecules that facilitate the assembly of  
85 multi-molecular complexes involved in vpiRNA biogenesis in *Ae. aegypti*.

86 To test this hypothesis, we performed a functional knockdown screen of all predicted *Ae. aegypti* Tudor  
87 proteins, in which knockdown of the hitherto uncharacterized Tudor protein AAEL012437 shows the most  
88 prominent vpiRNA depletion. Because of this dramatic effect on vpiRNA biogenesis and the fact that its  
89 direct *D. melanogaster* ortholog (CG9684) is largely uncharacterized, we decided to focus our attention on  
90 this protein, which we named Veneno (Ven). Ven-depletion dramatically reduces piRNA production from  
91 both viral RNA strands, while ping-pong dependent piRNA production from endogenous sources (Ty3-  
92 gypsy transposons and histone H4 mRNA) is only mildly affected. Ven resides in cytoplasmic foci,  
93 reminiscent of piRNA processing granules in *Drosophila* and interacts directly with Ago3 through  
94 canonical TUDOR domain-mediated sDMA recognition. In addition, Ven associates with orthologs of  
95 *Drosophila* piRNA pathway components Vasa (AAEL004978) and Yb (AAEL001939)<sup>9,26-31</sup>, which in turn  
96 binds Piwi5. We propose that this complex supports efficient ping-pong amplification of vpiRNAs by the  
97 PIWI proteins Ago3 and Piwi5.

98

## 99 MATERIALS AND METHODS

### 100 Tudor gene identification and ortholog detection

101 To allow comprehensive identification of all *Ae. aegypti* Tudor genes, we combined HHpred homology  
102 detection with Jackhmmer iterative searches<sup>32,33</sup>. Subsequently, identified sequences were aligned using T-  
103 Coffee to determine orthologous relations between *Ae. aegypti* and *D. melanogaster* Tudor proteins<sup>34</sup>. In  
104 view of the length of the Tudor domain (~50 AA) and low levels of sequence conservation among the  
105 family members, neighbor joining was used to identify orthology relations, which were consistent with the  
106 domain organization of the proteins. See Supplementary Information for a detailed description of our  
107 approach.

108

### 109 Transfection and infection of Aag2-cells

110 In knockdown experiments, cells were transfected with dsRNA and re-transfected 48 hours later to ensure  
111 prolonged knockdown. Where indicated, cells were infected with a recombinant Sindbis virus expressing  
112 GFP from a duplicated subgenomic promoter (SINV-GFP; produced from pTE3'2J-GFP<sup>35,36</sup>) at a  
113 multiplicity of infection (MOI) of 1 and harvested 48 hours post infection. For immunofluorescence (IFA)  
114 and immunoprecipitation (IP) experiments, Aag2 cells were transfected with expression plasmids encoding  
115 tagged transgenes and, where indicated, infected with SINV (produced from pTE3'2J<sup>35</sup>) at an MOI of 1  
116 three hours after transfection. All samples were harvested 48 hours after transfection. For mass  
117 spectrometry (MS) experiments, expression plasmids were transfected into cells using polyethylenimine  
118 (PEI) and infected 24 hours later with SINV at an MOI of 0.1. MS-samples were harvested 72 hours post  
119 infection. For a more detailed description of cell culture conditions, generation of stable cell lines,  
120 generation of expression vectors, and virus production, see Supplementary Information.

121

### 122 Small RNA northern blotting and RT-qPCR

123 For small RNA northern blotting, RNA was size separated on polyacrylamide gels and cross-linked to nylon  
124 membranes using 1-ethyl-3-(3-dimethylaminopropyl)carbodiimide hydrochloride<sup>37</sup>. Small RNAs were  
125 detected using <sup>32</sup>P-labelled DNA oligonucleotides. For quantitative RT-qPCR analyses, DNaseI-treated  
126 RNA was reverse transcribed and PCR amplified in the presence of SYBR green. See Supplementary  
127 Information for a detailed description of the experimental procedures, sequences of probes used for northern  
128 blotting, and qPCR primers.

129

### 130 Preparation of small RNA libraries and bioinformatic analyses

131 Total RNA from Aag2 cells transfected with dsRNA targeting either Veneno or Firefly Luciferase was used  
132 to generate small RNA deep sequencing libraries. For each condition, three transfections and library  
133 preparations were performed in parallel using Illumina's Truseq technology, as described in<sup>38</sup>. See  
134 Supplementary Information for a description of the additional details on the analyses of deep sequencing  
135 libraries.

136

### 137 **Fluorescence and microscopy**

138 Fluorescent imaging was performed on paraformaldehyde-fixed Aag2-cells that were permeabilized and  
139 counterstained using Hoechst-solution. Confocal images were taken using the Olympus FV1000  
140 microscope. Images used for the quantification of GFP-signal granularity were taken using the Zeiss Axio  
141 Imager Z1 with ApoTome technology. See Supplementary Information for more details of the experimental  
142 approach.

143

### 144 **Immunoprecipitation and western blotting**

145 GFP- and RFP-tagged transgenes were immunoprecipitated using GFP- and RFP-TRAP beads  
146 (Chromotek), respectively, according to manufacturer's instructions. V5-tagged transgenes were purified  
147 using V5-agarose beads (Sigma). For Ago3 and Piwi5 immunoprecipitation (IP) experiments, antibodies  
148 targeting endogenous proteins were added to lysates at 1:10 dilution and incubated for 4 hours at 4°C,  
149 followed by overnight binding to Protein A/G PLUS agarose beads (Santa Cruz). Protein extracts were  
150 resolved on polyacrylamide gels, blotted to nitrocellulose membranes, and probed with the indicated  
151 antibodies. Details on generation of Ago3 and Piwi5 antibodies, experimental procedures, and antibody  
152 dilutions can be found in the Supplementary Information.

153

### 154 **Mass spectrometry**

155 For mass spectrometry analysis, precipitated proteins were washed extensively and subjected to on-bead  
156 trypsin digestion as described previously<sup>39</sup>. Subsequently, tryptic peptides were acidified and desalted using  
157 Stagetips<sup>40</sup> before elution onto a NanoLC-MS/MS. Mass spectra were recorded on a QExactive mass  
158 spectrometer (Thermo Scientific). For detailed experimental procedures and the analyses of mass spectra,  
159 see Supplementary Information.

160

### 161 **Density gradient fractionation**

162 Lysate was separated on a 10-45% Sucrose gradient by ultracentrifugation. Subsequently, protein was  
163 precipitated in acetone and trichloroacetic acid and RNA was extracted using acid phenol/chloroform. For  
164 more details on the experimental procedures, see Supplementary Information.

## 165 RESULTS

### 166 Comprehensive identification of Tudor proteins in *Aedes aegypti*

167 Tudor proteins play fundamental roles in the biogenesis of piRNAs in both vertebrate and invertebrate  
168 species<sup>21,22</sup>. We therefore hypothesized that processing of viral RNA into piRNAs in *Ae. aegypti* also  
169 involves members of this protein family. To faithfully identify all *Ae. aegypti* Tudor genes and their  
170 corresponding fruit fly orthologs, we used a homology-based prediction approach combining HHPred and  
171 Jackhmmer algorithms<sup>32,33</sup>. First, we used HHPred homology detection to predict *D. melanogaster* TUDOR  
172 domain sequences, which were subsequently used as input for Jackhmmer iterative searches to identify all  
173 *D. melanogaster* and *Ae. aegypti* TUDOR domains. Ultimately, a neighbor joining tree was made based on  
174 a TUDOR domain alignment generated with T-Coffee<sup>34</sup>, which enabled the identification of orthologous  
175 relationships between *Ae. aegypti* and *D. melanogaster* Tudor proteins (Figure 1).

176 While the bootstrap values suggest relatively low phylogenetic signal in the TUDOR domains themselves,  
177 the majority of *Ae. aegypti* Tudor proteins cluster with a single *D. melanogaster* ortholog with a highly  
178 similar domain composition, providing independent support for the orthology relationships. Some genes  
179 however (e.g. AAEL022773, AAEL008101, AAEL009987 and AAEL023919) lack clear one-to-one  
180 orthology with *Drosophila* counterparts, suggesting that these genes emerged as a result of duplication  
181 events that occurred in the *Culicidae*. Conversely, CG15042 and Krimper in *D. melanogaster* likely resulted  
182 from a duplication in the *Drosophilidae*. Alternatively, the proteins without an ortholog may have been lost  
183 from the *Drosophila* lineage, or the proteins have diversified to an extent that they are no longer recognized  
184 as orthologous in the multiple sequence alignment. The AAEL008101 gene encodes two splice variants, of  
185 which only AAEL008101-PB is expressed in Aag2 cells (Figure S1C). Lastly, the *Ae. aegypti* genome  
186 encodes only one ortholog for the *D. melanogaster* Yb protein subfamily (Yb, SoYb and BoYb), namely  
187 AAEL001939, which we refer to as Yb. In cases where there is clear one-to-one orthology, *Aedes aegypti*  
188 will be named after their *Drosophila* ortholog throughout this study.



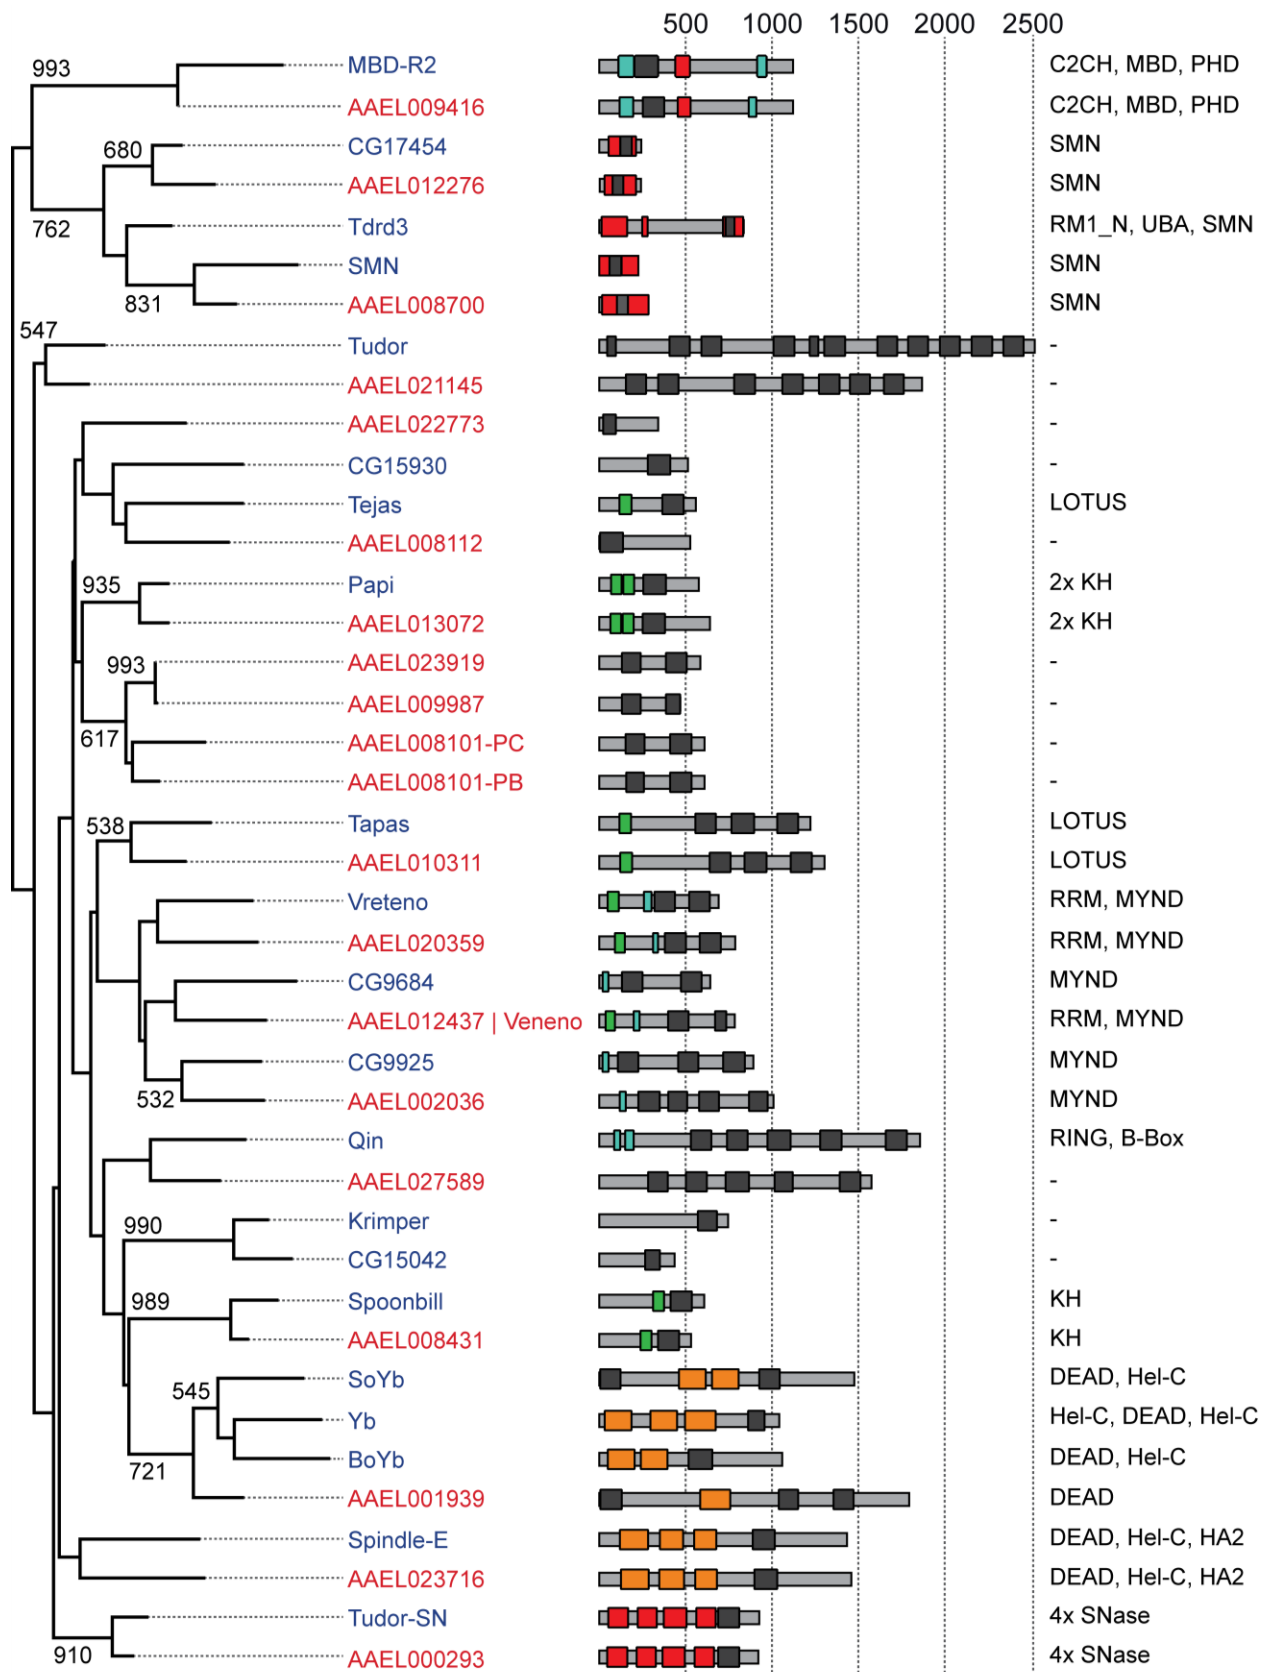

■ TUDOR Domain ■ Zinc Finger Domain ■ RNA binding Domain ■ Helicase Domain ■ Misc. Domain

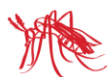

*Ae. aegypti* proteins

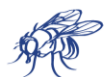

*D. melanogaster* proteins



### Figure 1. Orthologous Tudor proteins in *D. melanogaster* and *Ae. aegypti*.

On the left, a neighbor joining tree based on TUDOR domains from *Ae. aegypti* (red) and *D. melanogaster* (blue) is shown. Numbers indicate bootstrap values for 1000 iterations; only values >500 are shown. In the middle, predicted domain structures of Tudor proteins are drawn schematically, with TUDOR domains shown in black, zinc fingers in blue, putative RNA binding domains in green, domains associated with helicase activity in orange, and all other domains in red. Numbers at the top indicate protein length in amino acids. On the right, protein domains other than Tudor domains are presented, ordered from amino to carboxyl terminus, as indicated in the middle panel. As the AAEL008101 gene produces two splice variants encoding Tudor domains of slightly different composition (PB and PC), we included both as separate entities in our multiple sequence alignment.

B-box, B-box type zinc finger (Zf) domain; C2CH, C2CH-type Zf domain; C2H2, C2H2-type Zf domain; DEAD, DEAD box domain; HA2, Helicase-associated domain; Hel-C, helicase C domain; KH, K homology RNA-binding domain; LOTUS, OST-HTH/LOTUS domain; MBD, Methyl-CpG-binding domain; MYND, MYND (myeloid, Nervy, DEAF-1)-type Zf domain; PHD, PHD-type Zf domain; RING, RING-type Zf domain; RMI1\_N, RecQ mediated genome instability domain; RRM, RNA recognition motif; SMN, survival motor neuron domain; SNase, Staphylococcal nuclease homologue domain; UBA, ubiquitin associated domain.

### *Aedes aegypti* Tudor proteins are involved in vpiRNA biogenesis

189 We included all identified *Ae. aegypti* Tudor proteins along with AAEL004290 in a functional knockdown  
190 screen. AAEL004290 is the ortholog of Eggless, a histone methyltransferase involved in the piRNA  
191 pathway in *D. melanogaster* which is predicted to contain TUDOR domains<sup>41,42</sup>, although it did not surface  
192 in our HHpred-based homology detection.

193 In a previous study, deep sequencing of small RNAs from Sindbis-virus (SINV) infected Aag2 cells  
194 revealed that the majority of vpiRNAs are derived from a ~200nt hotspot in the SINV-capsid gene (Figure  
195 S1A)<sup>20</sup>. We selected four highly abundant sense (+) strand derived vpiRNA sequences from this hotspot  
196 region for small RNA northern blotting. Knockdown of several Tudor proteins lead to reduced vpiRNA  
197 levels in Aag2 cells, with knockdown of AAEL012437 resulting in the most prominent phenotype (Figure  
198 2). Knockdown was generally efficient, resulting in a 50 to 80% reduction of mRNA abundance for most  
199 genes (Figure 2 and S1C). For genes for which knockdown efficiency was suboptimal (Yb, AAEL008101  
200 and MBD-R2), we performed an additional knockdown experiment using different batches of dsRNA  
201 targeting these transcripts. Here, we found that vpiRNA levels are also diminished upon knockdown of Yb  
202 and AAEL008101-RB (Figure S1B). The observed effect on vpiRNA levels cannot be explained by changes  
203 in viral replication, as only minor differences were seen in viral RNA levels across knockdowns under these  
204 experimental conditions (Figure 2 and S1B, D-E). Moreover, changes in vpiRNA production did not  
205 correlate with expression levels of capsid RNA, which is the source of vpiRNAs that we probed for in this  
206 screen ( $R^2=0.0506$ ; Figure S1F). Interestingly, histone H4 mRNA-derived piRNA production, which has  
207 previously been shown to depend on amplification by Ago3 and Piwi<sup>543</sup>, was not affected by AAEL012437  
208 knockdown (Figure 2), suggesting that this protein acts in a complex that preferentially processes piRNAs  
209 from viral transcripts. As depletion of AAEL012437 resulted in the most prominent reduction of vpiRNA  
210 levels in repeated experiments (Figure S1G-H), we proceeded with a more detailed characterization of this

211 protein. Since the word virus comes from the Latin noun ‘poison’, we named this Tudor protein after the  
 212 indicative present of the Latin verb ‘to poison’: Veneno (Ven).

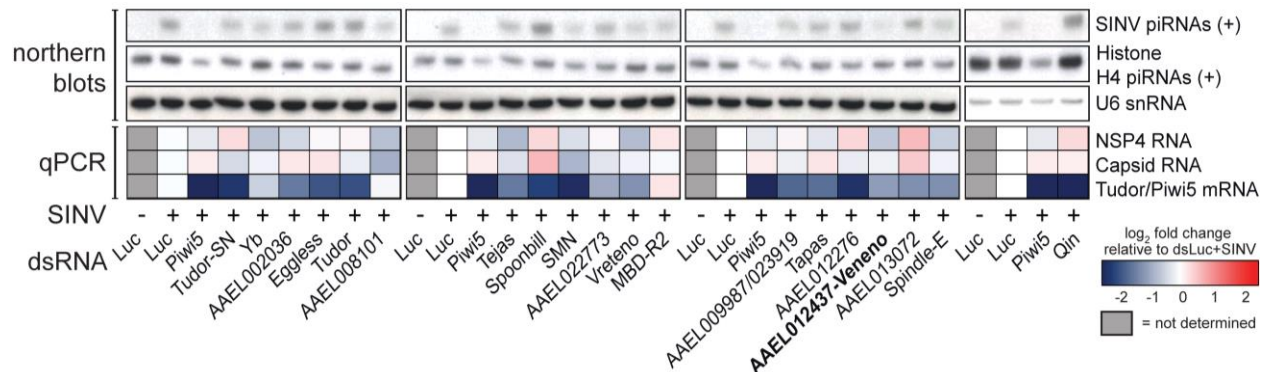

**Figure 2. Loss of vpiRNA production upon knockdown of several Tudor proteins.**

Tudor genes were knocked down in Aag2 cells by dsRNA transfection after which small RNA production of (+) strand Sindbis virus (SINV) and histone H4 mRNA (H4)-derived piRNAs was assessed using northern blot analyses. As controls, dsRNA targeting luciferase (dsLuc) and Piwi5 were used as negative and positive controls, respectively. U6 snRNA was used as a loading control. Aedes proteins that have a clear ortholog with similar domain composition are named after their Drosophila orthologs. The heat map depicts relative changes in NSP4 and Capsid viral RNA abundance and Tudor/Piwi5 knockdown efficiencies as determined by RT-qPCR. All expression values were normalized to SINV-infected dsLuc control samples. Grey boxes indicate samples for which no RT-qPCR was performed.

### 213 Depletion of Veneno predominantly affects production of viral piRNAs

214 Small RNA northern blotting is suitable for the detection of only a handful of highly abundant piRNAs. To  
 215 enable a more comprehensive analysis of small RNA populations upon Ven knockdown (KD), we prepared  
 216 small RNA deep sequencing libraries from Aag2 cells infected with SINV. Depletion of Ven resulted in a  
 217 strong reduction of vpiRNA production from both strands (75% and 80% reduction of (+) and (-) strand-  
 218 derived vpiRNAs, respectively), whereas viral siRNA levels were unaffected (Figure 3A-B). As reported  
 219 previously<sup>20</sup>, SINV-derived piRNAs exhibit the 1U/10A nucleotide bias and 5' end overlap indicative of  
 220 ping-pong dependent amplification (Figure 3C-D). The vpiRNAs that remain in dsVen libraries exhibit a  
 221 less pronounced nucleotide bias (Figure S2A) and 5' end overlap (Figure 3D), indicating ping-pong  
 222 amplification is reduced upon Ven-KD. The distribution of piRNAs across the viral genome and their size  
 223 profile is unchanged in Ven-KD libraries (Figure S2B-E), indicating that Ven is not directly responsible for  
 224 triggering vpiRNA production or determining vpiRNA length. The effect of Ven-KD on piRNA production  
 225 from transposable elements is minor compared to the changes in vpiRNA production, especially for those  
 226 derived from the (+) strand (25% and 55% reduction of piRNAs derived from (+) and (-) strand,  
 227 respectively; Figure S3A). As the vast majority (>75%) of all transposon-derived piRNAs in our libraries  
 228 originate from Ty3-gypsy elements (Figure S3B), the effects seen in this family may dominate the overall  
 229 phenotype of transposon piRNAs. Stratification of transposon-derived piRNAs into subclasses indeed  
 230 reveals only a mild effect of Ven-KD on piRNA production from Ty3-gypsy elements, 15% and 55%

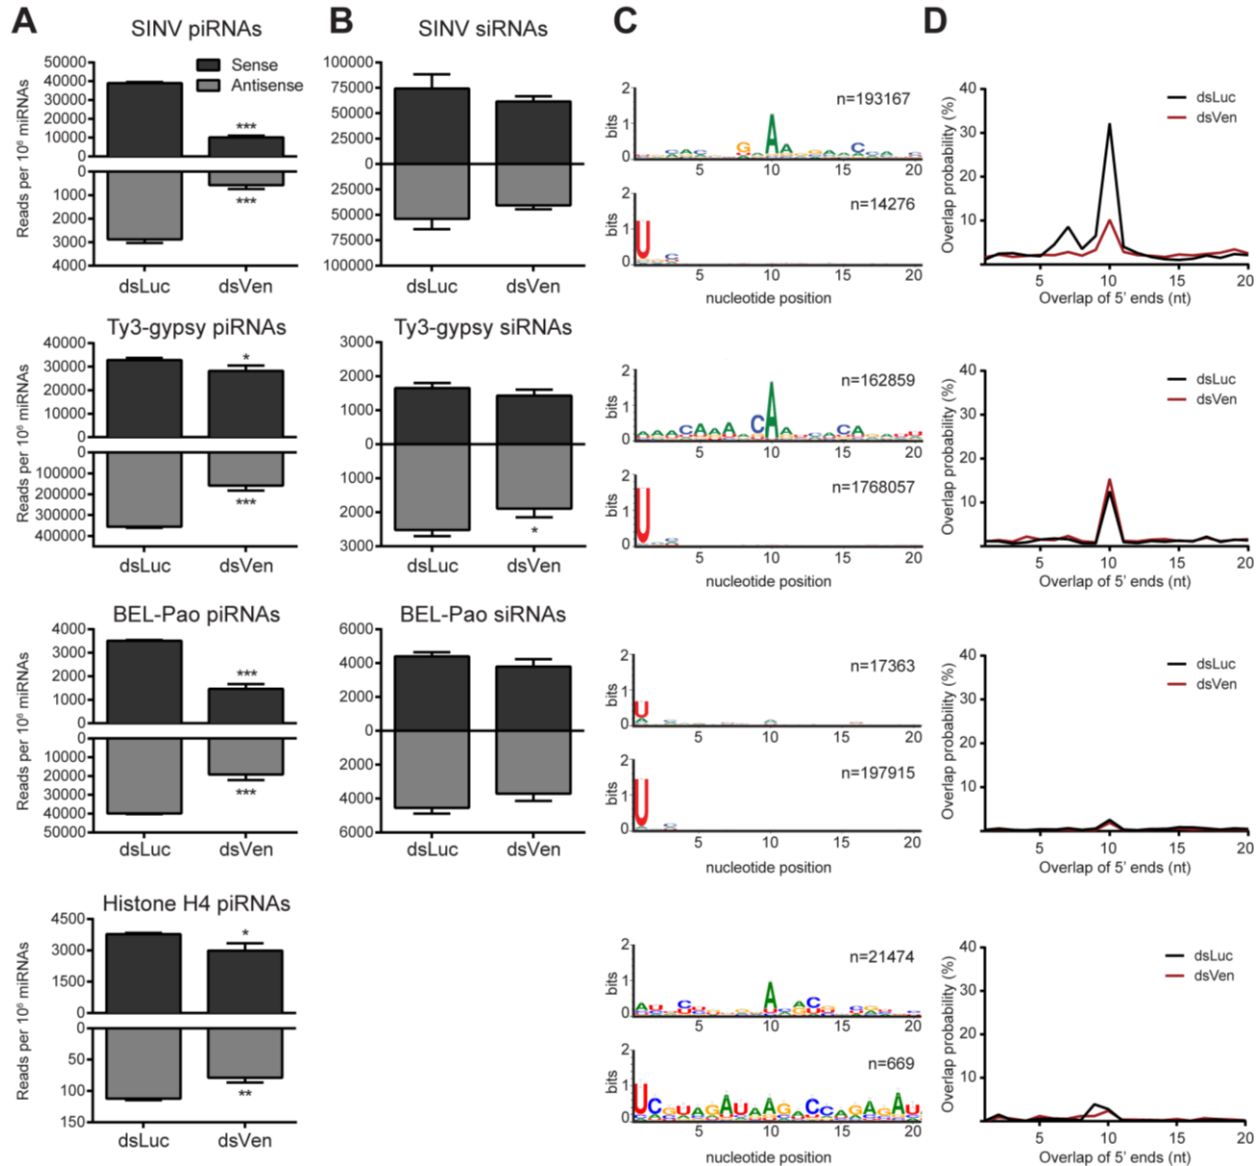

### Figure 3. Veneno is required for efficient biogenesis of vpiRNAs.

(A-B) Normalized read counts of 25-30 nt piRNAs (A) and 21 nt siRNAs (B) mapping to the Sindbis virus (SINV) genome (top row), Ty3-gypsy transposons (second row), BEL-Pao transposons (third row), and histone H4 mRNA (bottom row) upon knockdown of Veneno (dsVen) and control knockdown (Firefly Luciferase, dsLuc). Virtually no siRNA-sized reads mapping to histone H4 mRNA were found (~ 200 reads per library), and these are therefore not shown. (C) Nucleotide bias at the first 20 positions of the 25-30 nt small RNA reads mapping to sense strand (upper panel) and antisense strand (lower panel) of the indicated RNA substrates in dsLuc libraries (n = number of reads). (D) The probability of 5' overlap between piRNAs from opposite strands in dsLuc and dsVen libraries for piRNAs mapping to indicated RNA substrates. For bar charts in A and B, read counts of three independent libraries were normalized to the amount of miRNAs present in those libraries and analyzed separately for the sense (black) and antisense (grey) strands. Bars indicate mean +/- standard deviation. Two-tailed student's t-test was used to determine statistical significance (\* P < 0.05; \*\* P < 0.01, \*\*\* P < 0.001). To generate sequence logos and 5' overlap probability plots shown in C and D, reads of three independent libraries were combined.

232 reduction of (+) and (-) strand derived piRNAs, respectively (Figure 3A). The discrepancy between the  
233 effect of Ven-KD on vpiRNA production and Ty3-gypsy-derived piRNA production is especially intriguing  
234 as Ty3-gypsy elements comprise the only major class of transposable elements that is processed into  
235 piRNAs by the ping-pong amplification loop, as is evident from their strong ping-pong signature (Figure  
236 3C-D, S3C). Depletion of Ven results in reduced levels BEL-Pao element-derived piRNAs from both  
237 strands (Figure 3A), which make up the second-largest group of transposon-derived piRNAs (Figure S3B).  
238 In contrast to piRNAs derived from Ty3-gypsy elements, BEL-Pao piRNAs lack a 1U/10A nucleotide  
239 signature (Figure 3C) and display only a very minor 10nt overlap of 5' ends (Figure 3D). Instead, both sense  
240 and antisense BEL-Pao-derived piRNAs are enriched for 1U, suggesting that their production does not  
241 depend on ping-pong amplification but rather are on primary biogenesis or phased piRNA production.  
242 Generally, siRNA production was unchanged for all transposon subfamilies (Figure 3B, S3C). In  
243 accordance with northern blot analyses (Figure 2), ping-pong dependent histone H4 mRNA-derived piRNA  
244 levels were only mildly reduced upon Ven-KD (Figure 3A). Taken together, these findings suggest that  
245 Ven supports ping-pong dependent piRNA biogenesis preferentially from viral RNA.

246

#### 247 **Veneno localizes to cytoplasmic foci**

248 To further characterize the molecular function of Ven during vpiRNA biogenesis, we expressed GFP-  
249 tagged Ven and several domain mutants (Figure 4A) in Aag2 cells. In the process of cloning these  
250 constructs, we noticed that the annotation of the Ven-gene in AaegL3.5 on VectorBase was erroneous. We  
251 used Sanger sequencing of PCR products to revise the current gene annotation (Figure S4), which was  
252 corroborated by published Aag2 transcriptome data and the recently released *Aedes aegypti* mosquito  
253 reference genome assembly AaegL5<sup>44,45</sup>. GFP-tagged Ven accumulated in cytoplasmic foci reminiscent of  
254 the piRNA processing granules *nuage* and Yb bodies in *D. melanogaster* (Figure 4B)<sup>9,29</sup>. We tentatively  
255 term these foci Ven-bodies. In our revised annotation, Ven contains an RNA recognition motif (RRM) at  
256 its amino terminus. A mutant in which this motif has been removed (C91) retains its localization in Ven-  
257 bodies (Figure 4C), suggesting that putative RNA-binding by this domain is not required for granule  
258 formation. Additionally, Ven contains a Zn-finger of the MYND-type, a class of Zn-fingers predominantly  
259 involved in protein-protein interaction<sup>46</sup>. Removal of this MYND-domain (C234) abolishes granular  
260 accumulation of Ven (Figure 4E-F). Intrinsically disordered sequences have recently been shown to mediate  
261 RNA binding and regulate RNA metabolism<sup>47</sup>. Ven contains such an asparagine (N)-rich region directly  
262 upstream of the MYND-domain. A mutant in which this N-rich stretch as well as the RRM are removed  
263 (C199) but the MYND-domain is maintained, retains its localization in Ven-bodies (Figure 4D), which  
264 lends further support to the importance of the MYND-domain for the granular localization pattern.



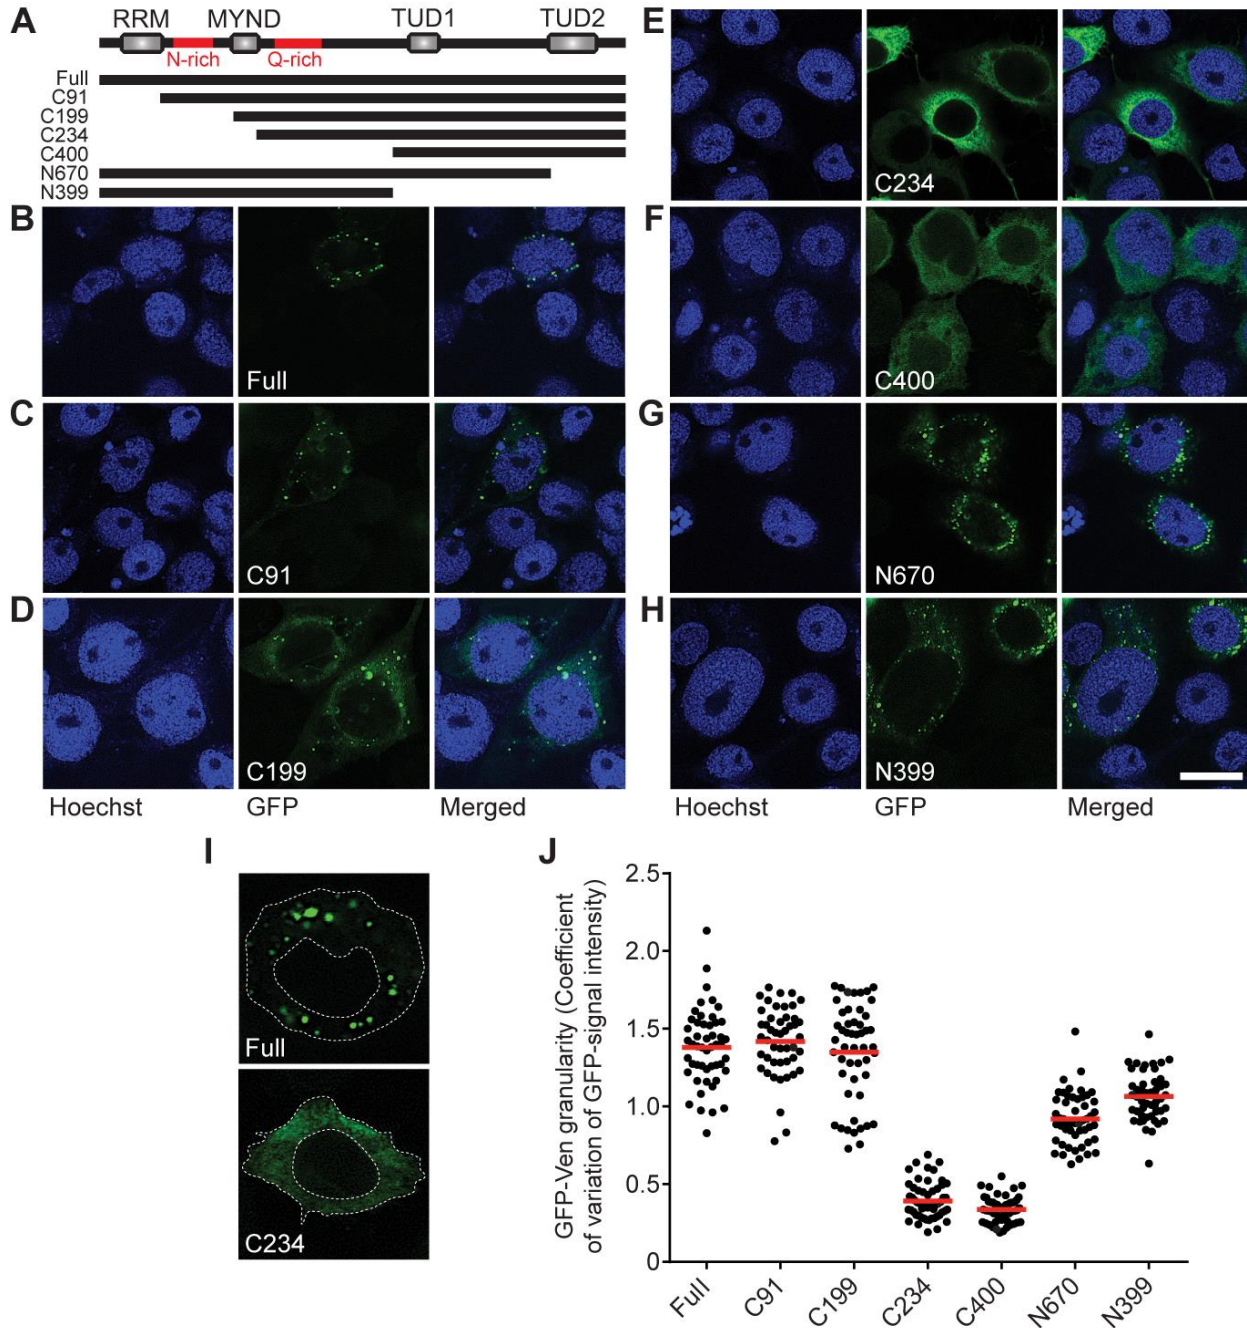

**Figure 4. Veneno accumulates in cytoplasmic Ven-bodies.**

(A) Schematic representation of Ven transgenes used in immunofluorescence experiments. (Full: amino acid [aa] 1-785; C91: aa 91-785; C199: aa 199-785; C234: aa 234-785; C400: aa 400-785; N670: aa 1-670; N399: aa 1-399; red lines indicate sequences of low amino acid complexity, rich in asparagines [N] or glutamines [Q]). (B-H) Representative confocal images of Aag2 cells expressing transgenes drawn schematically in (A). Scale bar represents 10  $\mu$ m. (I) The cytoplasm of 46-56 individual cells expressing GFP-tagged transgenes was traced as depicted and the mean and standard deviation of signal intensity was determined to calculate the coefficient of variation as a measure of signal granularity. (J) Scatter dot plot shows the GFP-signal granularity for individual cells; the red line indicates the mean.

265 Similarly, a Q-rich sequence directly downstream of the MYND-type Zn-finger is not sufficient for Ven-  
266 accumulation, as removal of the MYND domain alone (C234) disrupts Ven-body formation. Upon removal  
267 of the C-terminal (N670) or both TUDOR domains (N399), Vens distinct subcellular localization is largely  
268 retained, suggesting that TUDOR domains do not play a major role in granule formation (Figure 4G-H).  
269 To allow a more comprehensive analysis of Ven-body localization across mutants, we traced the  
270 cytoplasmic GFP-signal of ~50 cells per transgene (as shown in Figure 4I) and quantified the coefficient of  
271 variance of this signal as a measure for granularity. This analysis confirms that Ven-body accumulation is  
272 abolished upon removal of the MYND-type Zn-finger. Also, a slight decrease in granularity is seen upon  
273 removal of either one (N670) or both (N399) Tudor domains (Figure 4J), suggesting that additional protein-  
274 protein interactions may stabilize the Ven-body. Altogether, these findings suggest the MYND-type Zn-  
275 finger enables Ven localization into specific Ven-bodies where additional components of the mosquito  
276 piRNA biogenesis machinery may be recruited for efficient piRNA production.

277

### 278 **Veneno provides a molecular scaffold for a ping-pong amplification complex**

279 As Ven is important for efficient production of ping-pong dependent vpiRNAs (Figures 2-3), we  
280 hypothesized that the protein may serve as a molecular scaffold to facilitate an interaction between the ping-  
281 pong partners Ago3 and Piwi5. To investigate this hypothesis, we immunoprecipitated GFP-tagged Ven  
282 and probed using antibodies recognizing endogenous Ago3 and Piwi5 (Figure S5A for antibody  
283 characterization). We found that Ven interacts with Ago3, but not Piwi5, regardless of an ongoing SINV-  
284 infection (Figure 5A). Immunoprecipitation of GFP alone does not copurify Ago3, confirming that the  
285 interaction is indeed mediated by Ven. To further dissect the multimolecular network in which Ven  
286 participates, we employed quantitative mass spectrometry of immunoprecipitated GFP-Ven complexes  
287 from both uninfected and SINV-infected Aag2 cells. These data confirm the association with Ago3 and  
288 reveal interesting additional Ven-interactors (Figure 5B-C and Supplementary Table 1). Specifically, Yb is  
289 enriched in Ven-complexes immunoprecipitated from both mock- and SINV-infected cells. Probing the  
290 Ven-interactome for orthologs of factors involved in the ping-pong amplification loop in *Drosophila*, we  
291 found a slight enrichment of AAEL004978, the *Ae. aegypti* ortholog of Vasa (Figure 5B-C). *Drosophila*  
292 Vasa recruits PIWI proteins to accommodate ping-pong amplification and is believed to be expressed  
293 exclusively in germline tissues. Yet, we verified that *Ae. aegypti* Vasa and other components of the piRNA  
294 biogenesis machinery are expressed in both the germline and somatic tissues in female *Ae. aegypti*  
295 mosquitoes (Figure S5B), implying the complex is capable of producing vpiRNAs upon arbovirus infection  
296 in the soma. We verified abovementioned interactions by co-purifying the constituents of the complex in  
297 reciprocal IPs followed by western blot (Figure 5D). Interestingly, we also detect Piwi5 as a direct  
298 interaction partner of Yb (Figure 5D). In sucrose density gradient fractionation, Ven co-sediments with

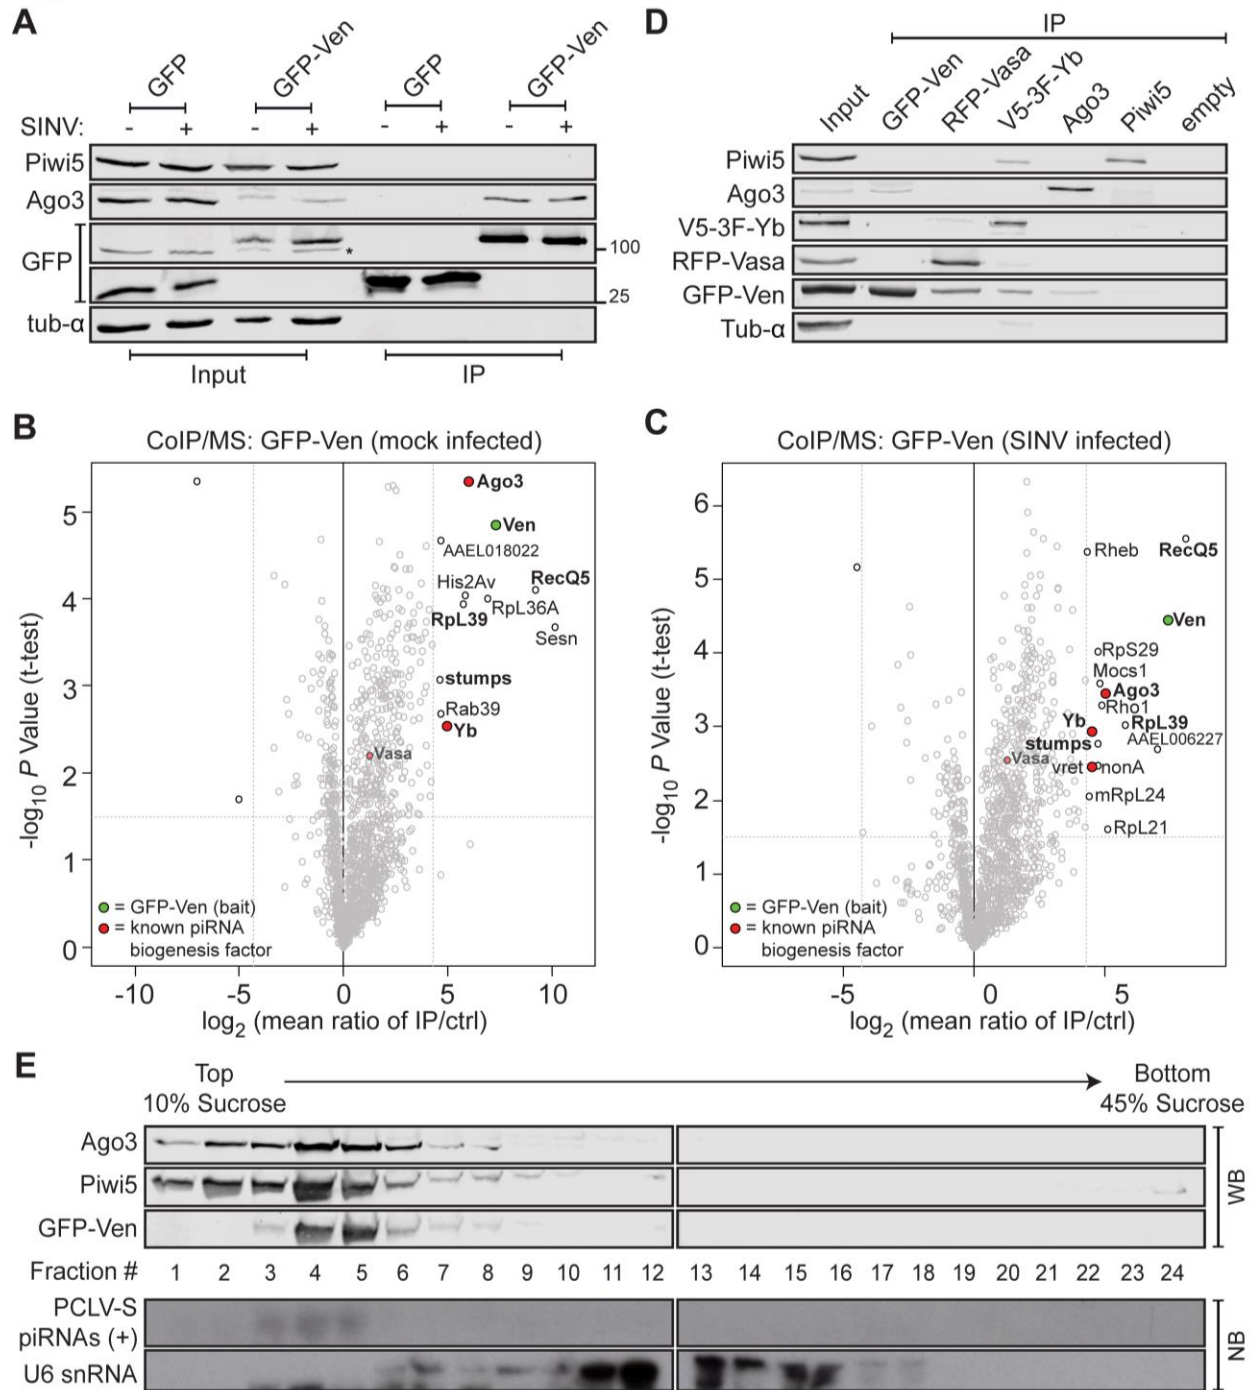



**Figure 5. Characterization of a multi-protein complex containing the ping-pong partners Ago3 and Piwi5.** **(A)** Protein lysates from SINV-infected (+) and uninfected (-) Aag2 cells transfected with expression plasmids encoding GFP or GFP-Ven before (Input) and after GFP-immunoprecipitation (IP) were analyzed for (co)purification of endogenous Ago3 and Piwi5, as well as the GFP-tagged transgene by western blot. The asterisk indicates a non-specific band. **(B-C)** Identification of Ven-interacting proteins in lysates from both mock- (B) and Sindbis virus (SINV)-infected Aag2 cells (C) by label-free quantitative (LFQ) mass spectrometry. Permutation-based FDR-corrected t-tests were used to determine proteins that are statistically enriched in the Ven-IP. The LFQ-intensity of GFP-Ven IP over a control IP using the same lysate and non-specific beads ( $\log_2$ -transformed) is plotted against the  $-\log_{10} P$  value. Interactors with an enrichment of  $\log_2$  fold change  $> 4.3$ ;  $-\log_{10} P$  value  $> 1.5$  are indicated. Proteins in the top right corner represent the bait protein in green (Ven) and its interactors. Orthologs of known piRNA biogenesis factors in *D. melanogaster* are indicated in red and interacting proteins present in both mock- and SINV-infected pulldowns are shown in **bold** font. Where available, interacting proteins were named according to their ortholog in *D. melanogaster*. In case of uncharacterized orthologous *Drosophila* proteins, we assigned the Vectorbase GeneID to the protein. **(D)** Reciprocal IPs of GFP-Ven, RFP-Vasa, V5-3xflag-Yb, Ago3 and Piwi5 using antibodies targeting GFP, RFP, V5, Ago3 and Piwi5, respectively. Samples were probed with antibodies against GFP, RFP, Flag, Ago3, Piwi5 and  $\alpha$ -tubulin, as indicated. **(E)** Lysate from Aag2 cells stably expressing GFP-Ven was fractionated on a 10-45% Sucrose gradient. Protein fractions were size separated and stained using antibodies against GFP, Ago3 and Piwi5. RNA samples from those fractions were analyzed by northern blot analysis, using probes targeting abundant (+) strand ping-pong dependent piRNAs produced from the S-segment of the PCLV bunyavirus and U6 snRNA. All fractions contain proteinaceous material as is evidenced by silver staining (Figure S5D); spliceosomal ribonucleoprotein complexes are enriched in fractions 11-16.

299 Ago3 and Piwi5 (most prominently in fractions 4-5) and with piRNAs produced from the S-segment of the  
300 Phasi Charoen-like bunyavirus (Figure 5E), a known contaminant of the Aag2 cell line which has  
301 previously been reported to produce piRNAs through ping-pong amplification<sup>48,49</sup>. Altogether, this further  
302 suggests that Ven forms a multiprotein complex with Ago3 and Piwi5. Additionally, we find that Ven,  
303 Ago3, Piwi5, Yb and Vasa colocalize to Ven bodies, suggesting these granules are indeed the sites of  
304 vpiRNA biogenesis (Figure S5D). The effect of Yb-KD mirrors the effects seen in Ven-KD libraries, with  
305 the strongest reduction in vpiRNA levels and only moderate effects on transposon- and histone H4 mRNA-  
306 derived piRNAs (Figure S5E). The effects seen upon Yb-KD are less pronounced than those in Ven-KD  
307 libraries, which is likely due to relatively inefficient knockdown of Yb. Together, these findings reveal the  
308 presence of a multi-molecular complex in which the ping-pong partners Ago3 and Piwi5 are brought  
309 together by the Tudor proteins Ven and Yb to promote efficient piRNA production (Figure 6E).

310

### 311 **Ven-Ago3 interaction depends on sDMA-recognition**

312 Interaction between TUDOR and PIWI proteins generally depends on recognition of symmetrically  
313 dimethylated arginines (sDMAs) on PIWI proteins by an aromatic cage encoded in the TUDOR domain<sup>25</sup>.  
314 To further characterize the domain required for the interaction between Ven and Ago3, we  
315 immunoprecipitated truncated Ven transgenes and assessed copurification of Ago3. A truncated Ven-  
316 mutant lacking the RRM (C206-Figure 6A) still strongly associates with Ago3 (Figure 6C). Moreover, this  
317 mutant retains its association in a complex involving Yb, Vasa and Piwi5 as shown by mass spectrometry

318 (Figure S6A, Supplementary Table 2) and reciprocal IPs (Figure S6B). The MYND-domain mutant (C234),  
319 in which the distinct localization pattern is distorted (Figure 4), still aptly binds Ago3, suggesting that  
320 granular localization in Ven-bodies is not required for Ago3-interaction (Figure 6C). The carboxyl terminus  
321 containing two TUDOR domains (C400) is sufficient for interaction with Ago3, whereas Ago3-binding is  
322 lost upon deletion of the second (206-669) or both (206-399) Tudor domains (Figure 6C). However, this  
323 loss of binding may result from reduced expression or stability of these mutants. Hence, to further specify  
324 whether Ven-Ago3 interaction is TUDOR domain mediated, we generated Ven transgenes carrying point  
325 mutations in residues predicted to be involved in sDMA recognition (2 $\Delta$ : C206-G463A/Y465A and 4 $\Delta$ :  
326 C206-G463A/Y465A/D483A/N486A; Figure 6B). We found that the second TUDOR domain of Ven is  
327 atypical in that only one of the predicted aromatic cage residues is conserved (Figure S6C). We therefore  
328 analyzed binding of Ago3 to Ven that carries point mutations in the first TUDOR domain. Interaction with  
329 Ago3 was lost in these mutants, suggesting that the first TUDOR domain of Ven binds Ago3 in a canonical  
330 sDMA-dependent manner (Figure 6C). It is likely that the C-terminal TUDOR domain is not involved in  
331 Ago3 binding via sDMAs since critical residues are not conserved (Figure S6C). However, we cannot fully  
332 exclude that cooperative binding of both TUDOR domains by Ago3 is required for efficient association  
333 with Ven. To verify that Ago3 bears sDMA modifications, we made use of Aag2 cells stably expressing  
334 GFP-tagged Ago3 to enable simultaneous detection of GFP-Ago3 and sDMA modifications. We found a  
335 specific sDMA signal overlapping with the signal of immunopurified GFP-Ago3 (Figure 6D), indicating  
336 Ago3 indeed contains symmetrically dimethylated arginines. Endogenous Ago3 present in Ven-complexes  
337 also bears symmetrically dimethylated arginines, further supporting the notion that Ven-Ago3 interaction  
338 is mediated by sDMA recognition. The interaction with Ago3 is not required for localization of Ven in Ven-  
339 bodies, as introducing the indicated point mutations (G463A/Y465A) in the context of the full length  
340 protein does not affect its subcellular localization pattern (Figure 6E). Altogether, our findings support a  
341 model in which Veneno, through sDMA recognition, recruits Ago3 to a multi-molecular complex that  
342 promotes ping-pong amplification of piRNAs preferentially from exogenous RNAs (Figure 6F).

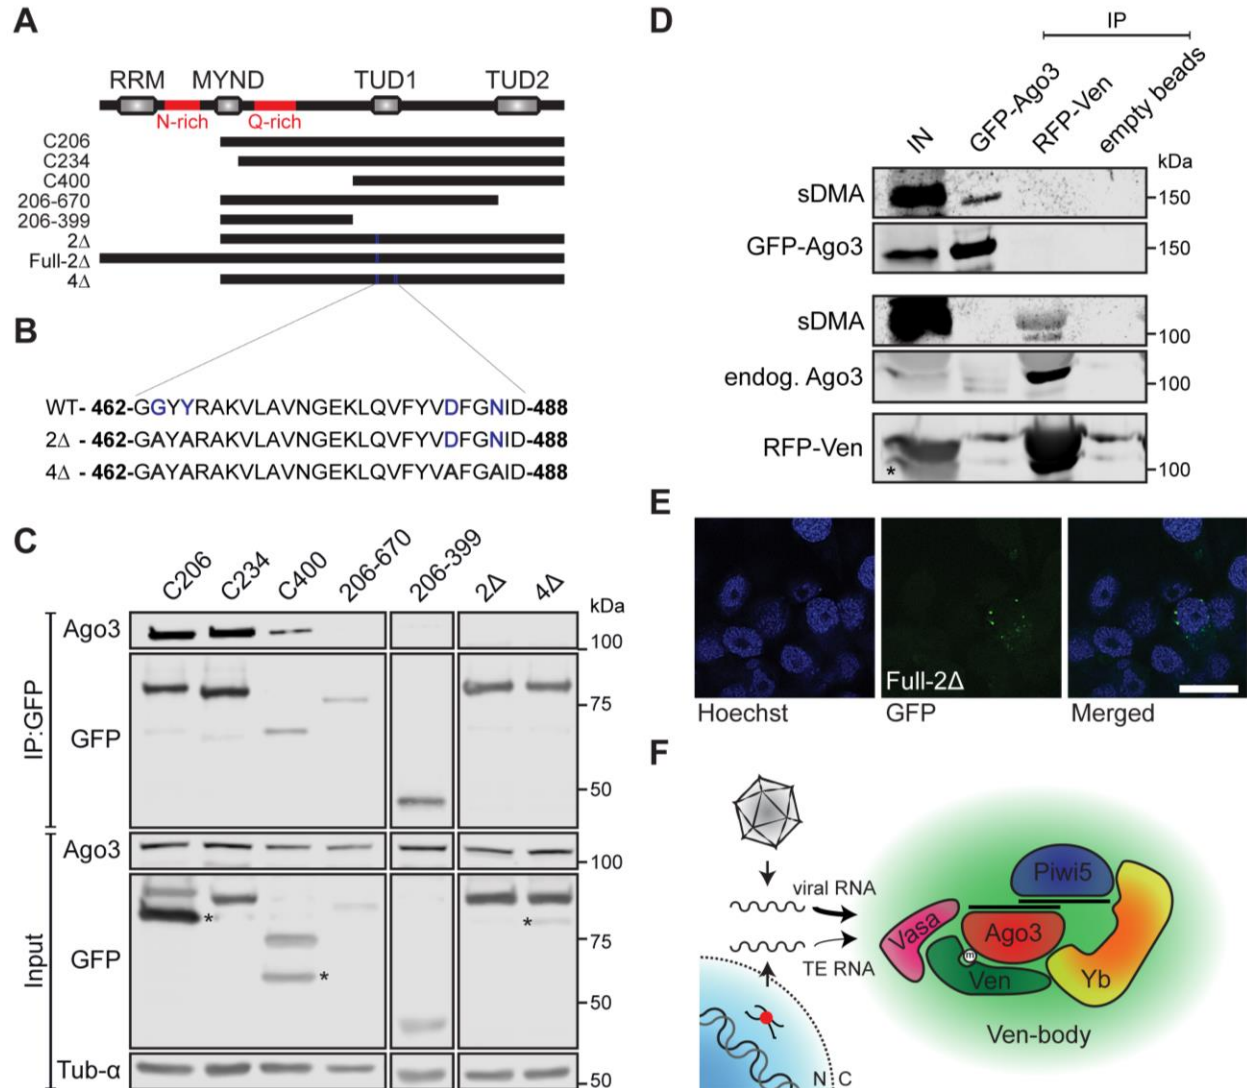

**Figure 6. Ven-Ago3 interaction is mediated by sDMA-recognition.**

**(A)** Schematic representation of Veneno transgenes used in Ago3 co-IP experiments. (C206: amino acid [aa] 206-785; C234: aa 234-785; C400: aa 400-785; 206-669: aa 206-669; 206-399: aa 206-399; 2Δ: C206-G463A/Y465A; Full-2Δ: G463A/Y465A; 4Δ: C206-G463A/Y465A/D483A/N486A; red lines indicate sequences of low amino acid complexity, rich in asparagines [N] or glutamines [Q]). **(B)** Sequence corresponding to a part of the first Tudor domain with residues indicated that were mutated in the 2Δ and 4Δ transgenes. Residues indicated in blue are predicted to be involved in sDMA recognition. **(C)** Lysates from Aag2 cells expressing indicated GFP-tagged Ven transgenes were subjected to GFP-IP and subsequently analyzed for co-purification of Ago3 by western blot. α-Tubulin serves as loading control. Asterisks indicate non-specific bands. **(D)** Lysate from Aag2 cells stably expressing GFP-Ago3 and transiently transfected with a plasmid encoding RFP-Ven was immunoprecipitated using GFP-, RFP- and empty beads. Western blots were stained using antibodies for GFP, RFP, and symmetrical dimethylated arginines (sDMA). The asterisk indicates a non-specific band. **(E)** Representative confocal image of Aag2 cells expressing GFP-tagged Ven-2Δ-mutant; scale bar represents 10μm. **(F)** Schematic model of the identified multi-protein complex responsible for ping-pong amplification of exogenous (viral) and endogenous (transposable element, TE)-derived piRNAs. The thickness of the arrows reflects the relative contribution of the complex to processing of different RNA substrates. N, nucleus; C, cytoplasm.

## 343 **DISCUSSION**

344 Mosquito antiviral immunity largely relies on the processing of viral dsRNA into virus-derived siRNAs  
345 that direct the degradation of viral RNA. The discovery of *de novo* production of vpiRNAs from arboviral  
346 RNA however, uncovered the intriguing possibility of an additional small RNA-based line of defense  
347 against arboviruses. Processing of viral dsRNA into vsiRNAs by the siRNA pathway has been thoroughly  
348 characterized in mosquitoes<sup>50,51</sup>. As of yet, it is unclear how viral RNA produced in the cytoplasm is entered  
349 into the piRNA pathway, especially as canonical substrates for the piRNA pathway are genomically  
350 encoded single-stranded precursors<sup>3,4</sup>. To better understand how viral RNA is detected by the mosquito  
351 piRNA pathway, more insights into the multimolecular machinery that processes viral RNA into vpiRNAs  
352 is needed.

353 In *Ae. aegypti*, vpiRNAs are amplified by the ping-pong partners Ago3 and Piwi5, but auxiliary proteins  
354 involved in this process were unknown. As a tightly regulated network of Tudor proteins promotes  
355 production of piRNAs in *Drosophila*<sup>21,22</sup>, we performed a comprehensive knockdown screen to evaluate  
356 the role of *Ae. aegypti* Tudor proteins in vpiRNA biogenesis. Knockdown of several Tudor genes affects  
357 vpiRNA biogenesis, with knockdown of Veneno (Ven) resulting in the strongest depletion of vpiRNAs.  
358 Additional candidates that show depletion in vpiRNA levels are Yb and AAEL008101; a gene which does  
359 not contain a one-to-one ortholog in the fruit fly. Whereas involvement of Yb in vpiRNA biogenesis is  
360 likely explained by its central place in the multi-protein complex discovered in this study, the molecular  
361 function of AAEL008101 remains to be elucidated. We cannot exclude that additional Tudor proteins play  
362 a role in vpiRNA biogenesis, which may be masked by redundancy of paralogous proteins or residual  
363 protein activity after suboptimal knockdown efficiency.

364 Thus far, the direct ortholog of Ven in *D. melanogaster* (CG9684) has not been studied extensively. In a  
365 systematic analysis of all *Drosophila* Tudor proteins, germline-specific knockdown of CG9684 did not  
366 affect steady-state levels of transposon transcripts or female fertility rate<sup>28</sup>. This study, however, did not  
367 evaluate the effect of CG9684 knockdown on small RNA populations.

368 Ven accumulates in cytoplasmic foci similar to piRNA processing bodies in the fly. In *Drosophila* somatic  
369 follicle cells, which surround the germ cells, primary piRNA biogenesis takes place in Yb bodies. One of  
370 the core factors present in these structures is their eponym Yb<sup>28-30</sup>. Yet, no piRNA amplification takes place  
371 in Yb bodies, since the ping-pong partners Aub and Ago3 are not expressed in follicle cells<sup>52,53</sup>. In contrast,  
372 in *Drosophila* germ cells piRNA amplification takes place in the *nuage* and one of the core proteins of this  
373 perinuclear structure is the helicase Vasa<sup>9,26,27</sup>. In *Drosophila* and silkworm, Vasa is directly implicated in  
374 secondary piRNA amplification by preventing non-specific degradation of piRNA precursors and  
375 facilitating their transfer to PIWI proteins<sup>26</sup>. Yb is not present in *nuage* but it has been suggested that its  
376 function may be taken over by its paralogous family members: brother and sister of Yb (BoYb and SoYb,

377 respectively)<sup>28</sup>. In *Ae. aegypti* only one paralog of Yb is encoded, which associates directly with Ven and  
378 Piwi5. The presence of a multi-protein complex containing orthologs of Vasa and Yb supports the idea that  
379 Ven-bodies resemble *nuage*-like piRNA processing bodies. Similar to Ven, the *Drosophila* Tudor protein  
380 Krimper localizes in perinuclear granules, which are lost upon deletion of the amino terminus of the  
381 protein<sup>54,55</sup>. While Krimper directly interacts with both partners in the ping-pong loop in flies (Ago3 and  
382 Aub), Ven associates exclusively with Ago3. Moreover, while Krimper-Ago3 interaction is retained when  
383 using an arginine-methylation-deficient mutant of Ago3 in fruit flies, an sDMA-recognition-deficient  
384 mutant of Ven is unable to bind Ago3 in *Ae. aegypti*. Thus, sDMA modifications seem to be required for  
385 Ven-Ago3 interaction in mosquitoes, but dispensable for Krimper-Ago3 association in fruit flies.  
386 Knockdown of Ven greatly affects production of piRNAs derived from exogenous viral RNA, while only  
387 a modest reduction of endogenous histone H4 mRNA- and transposon-derived secondary piRNA levels is  
388 seen. The apparent stability of histone H4 derived piRNAs is especially surprising, as their production has  
389 previously been shown to depend on ping-pong amplification involving the PIWI proteins Ago3 and  
390 Piwi5<sup>43</sup>. Similarly, ping-pong dependent piRNA production from Ty3-gypsy transposable elements is  
391 affected only mildly by Ven-KD.  
392 Bel-Pao-derived piRNA production is largely independent of ping-pong amplification, as is evident from  
393 the weak 1U/10A signature and 10nt overlap of piRNA 5'ends. Therefore, we were surprised to find a  
394 strong reduction in Bel-Pao-derived piRNAs upon Ven-KD. Apart from secondary piRNA production in  
395 the ping-pong loop, piRNA-mediated cleavage of transposon mRNA may trigger the production of phased  
396 piRNAs bearing a strong 1U bias<sup>10,11</sup>. This mechanism of phased piRNA production seems to be particularly  
397 active in *Ae. aegypti*<sup>56</sup>. Hence, a modest reduction of ping-pong dependent piRNA levels may result in  
398 strong reduction of phased piRNA production which could explain the strong effect of Ven-KD of  
399 production of BEL-Pao-derived piRNAs.  
400 Our data suggest that Ven is involved in specifying the substrate for piRNA production and may  
401 preferentially shuttle viral RNA into the ping-pong loop. It would be interesting to assess whether viral  
402 RNA from other arbovirus families are similarly affected by Ven knockdown, which would point towards  
403 a more general role of Ven in self-nonsel discrimination. Dependency on specific co-factors for the  
404 biogenesis of small RNAs from different RNA sources is not unprecedented. For example, the siRNA  
405 pathway co-factor Loqs-PD is required for processing of endogenous siRNA-precursors, but is dispensable  
406 for siRNA production from exogenous dsRNA or viral RNA<sup>57,58</sup>. Another study showed that the Tudor  
407 protein Qin/Kumo specifically prevents (+) strand transposon RNAs from becoming Piwi-bound piRNAs  
408 during the process of piRNA phasing<sup>59</sup>. Analogies can also be drawn to the vertebrate piRNA pathway,  
409 where Tdrd1, the closest mouse ortholog of Ven, ensures processing of the correct transcripts by the piRNA  
410 pathway<sup>60</sup>. Accordingly, the PIWI protein Mili contains a disproportionately large population of piRNAs



411 derived from cellular mRNA and ribosomal RNA in *Tdrd1* knockout mice. In a similar fashion, Ven could  
412 promote processing specifically of viral RNA by the mosquito piRNA pathway. Yet, we expect the  
413 molecular mechanism underlying this Tudor protein-guided sorting to be different as Tdrd1 interacts with  
414 Mili, the PIWI protein that predominantly binds 1U biased primary piRNAs, whereas Ven associates with  
415 Ago3, which mainly binds 10A biased secondary piRNAs.

416 A sophisticated network of accessory proteins that guides diverse RNA substrates into distinct piRISC  
417 complexes may be of particular importance in *Ae. aegypti* as this mosquito species encodes an expanded  
418 PIWI gene family consisting of seven members<sup>61,62</sup>, of which four (*Ago3* and *Piwi 4-6*) are expressed in  
419 somatic tissues<sup>63</sup>. Moreover, the repertoire of RNA molecules that are processed into piRNAs is extended  
420 to include viral RNA<sup>13</sup>. Tudor proteins like Veneno may therefore aid in streamlining piRNA processing  
421 and allow flexible adaptation of the piRNA pathway in response to internal and external stimuli such as  
422 arbovirus infection.

423

#### 424 **ACKNOWLEDGEMENTS**

425 We thank members of the Van Rij laboratory for fruitful discussions, Eugene Berezikov (European  
426 Research Institute for the Biology of Aging) for bioinformatic advice, the Microscopic Imaging Centre of  
427 Radboudumc for support for confocal microscopy, and Siebe van Genesen for assistance with density  
428 gradient fractionation. Sequencing was performed by the GenomEast platform, a member of the “France  
429 Génomique” consortium (ANR-10-INBS-0009). We would also like to thank Gorben Pijlman (University  
430 of Wageningen) for kindly providing the pPubB-GW vector, Frank van Kuppeveld (Utrecht University)  
431 for the rabbit-anti-GFP antibody, and the Carnegie Institution of Washington for the *Drosophila* Gateway  
432 Vector collection. This work is financially supported by a PhD fellowship from Radboud University  
433 Medical Center to PM, a European Research Council Consolidator Grant under the European Union’s  
434 Seventh Framework Programme (grant number ERC CoG 615680) and a VICI grant from the Netherlands  
435 Organization for scientific Research (grant number 016.VICI.170.090) to RPvR.

## 436 REFERENCES

- 437 1 Ghildiyal, M. & Zamore, P. D. Small silencing RNAs: an expanding universe. *Nat Rev Genet* **10**, 94-  
438 108, doi:10.1038/nrg2504 (2009).
- 439 2 Meister, G. Argonaute proteins: functional insights and emerging roles. *Nat Rev Genet* **14**, 447-  
440 459, doi:10.1038/nrg3462 (2013).
- 441 3 Czech, B. & Hannon, G. J. One Loop to Rule Them All: The Ping-Pong Cycle and piRNA-Guided  
442 Silencing. *Trends in biochemical sciences* **41**, 324-337, doi:10.1016/j.tibs.2015.12.008 (2016).
- 443 4 Hirakata, S. & Siomi, M. C. piRNA biogenesis in the germline: From transcription of piRNA genomic  
444 sources to piRNA maturation. *Biochim Biophys Acta* **1859**, 82-92,  
445 doi:10.1016/j.bbagr.2015.09.002 (2016).
- 446 5 Lim, R. S. & Kai, T. A piece of the pi(e): The diverse roles of animal piRNAs and their PIWI partners.  
447 *Semin Cell Dev Biol* **47-48**, 17-31, doi:10.1016/j.semcdb.2015.10.025 (2015).
- 448 6 Brennecke, J. *et al.* Discrete small RNA-generating loci as master regulators of transposon activity  
449 in *Drosophila*. *Cell* **128**, 1089-1103, doi:10.1016/j.cell.2007.01.043 (2007).
- 450 7 Gunawardane, L. S. *et al.* A slicer-mediated mechanism for repeat-associated siRNA 5' end  
451 formation in *Drosophila*. *Science* **315**, 1587-1590, doi:10.1126/science.1140494 (2007).
- 452 8 Cora, E. *et al.* The MID-PIWI module of Piwi proteins specifies nucleotide- and strand-biases of  
453 piRNAs. *RNA* **20**, 773-781, doi:10.1261/rna.044701.114 (2014).
- 454 9 Lim, A. K. & Kai, T. Unique germ-line organelle, nuage, functions to repress selfish genetic  
455 elements in *Drosophila melanogaster*. *Proceedings of the National Academy of Sciences of the*  
456 *United States of America* **104**, 6714-6719, doi:10.1073/pnas.0701920104 (2007).
- 457 10 Mohn, F., Handler, D. & Brennecke, J. Noncoding RNA. piRNA-guided slicing specifies transcripts  
458 for Zucchini-dependent, phased piRNA biogenesis. *Science* **348**, 812-817,  
459 doi:10.1126/science.aaa1039 (2015).
- 460 11 Han, B. W., Wang, W., Li, C., Weng, Z. & Zamore, P. D. Noncoding RNA. piRNA-guided transposon  
461 cleavage initiates Zucchini-dependent, phased piRNA production. *Science* **348**, 817-821,  
462 doi:10.1126/science.aaa1264 (2015).
- 463 12 Lewis, S. H. *et al.* Pan-arthropod analysis reveals somatic piRNAs as an ancestral defence against  
464 transposable elements. *Nature ecology & evolution* **2**, 174-181, doi:10.1038/s41559-017-0403-4  
465 (2018).
- 466 13 Miesen, P., Joosten, J. & van Rij, R. P. PIWIs Go Viral: Arbovirus-Derived piRNAs in Vector  
467 Mosquitoes. *PLoS Pathog* **12**, e1006017, doi:10.1371/journal.ppat.1006017 (2016).
- 468 14 Kraemer, M. U. *et al.* The global distribution of the arbovirus vectors *Aedes aegypti* and *Ae.*  
469 *albopictus*. *Elife* **4**, e08347, doi:10.7554/eLife.08347 (2015).
- 470 15 Lambrechts, L. & Scott, T. W. Mode of transmission and the evolution of arbovirus virulence in  
471 mosquito vectors. *Proc Biol Sci* **276**, 1369-1378, doi:10.1098/rspb.2008.1709 (2009).
- 472 16 Myles, K. M., Wiley, M. R., Morazzani, E. M. & Adelman, Z. N. Alphavirus-derived small RNAs  
473 modulate pathogenesis in disease vector mosquitoes. *Proceedings of the National Academy of*  
474 *Sciences of the United States of America* **105**, 19938-19943, doi:10.1073/pnas.0803408105  
475 (2008).
- 476 17 Samuel, G. H., Wiley, M. R., Badawi, A., Adelman, Z. N. & Myles, K. M. Yellow fever virus capsid  
477 protein is a potent suppressor of RNA silencing that binds double-stranded RNA. *Proceedings of*  
478 *the National Academy of Sciences of the United States of America* **113**, 13863-13868,  
479 doi:10.1073/pnas.1600544113 (2016).
- 480 18 Sanchez-Vargas, I. *et al.* Dengue virus type 2 infections of *Aedes aegypti* are modulated by the  
481 mosquito's RNA interference pathway. *PLoS Pathog* **5**, e1000299,  
482 doi:10.1371/journal.ppat.1000299 (2009).



- 483 19 Cirimotich, C. M., Scott, J. C., Phillips, A. T., Geiss, B. J. & Olson, K. E. Suppression of RNA  
484 interference increases alphavirus replication and virus-associated mortality in *Aedes aegypti*  
485 mosquitoes. *BMC Microbiol* **9**, 49, doi:10.1186/1471-2180-9-49 (2009).
- 486 20 Miesen, P., Girardi, E. & van Rij, R. P. Distinct sets of PIWI proteins produce arbovirus and  
487 transposon-derived piRNAs in *Aedes aegypti* mosquito cells. *Nucleic acids research* **43**, 6545-6556,  
488 doi:10.1093/nar/gkv590 (2015).
- 489 21 Siomi, M. C., Mannen, T. & Siomi, H. How does the royal family of Tudor rule the PIWI-interacting  
490 RNA pathway? *Genes & development* **24**, 636-646, doi:10.1101/gad.1899210 (2010).
- 491 22 Pek, J. W., Anand, A. & Kai, T. Tudor domain proteins in development. *Development* **139**, 2255-  
492 2266, doi:10.1242/dev.073304 (2012).
- 493 23 Maurer-Stroh, S. *et al.* The Tudor domain 'Royal Family': Tudor, plant Agenet, Chromo, PWWP and  
494 MBT domains. *Trends in biochemical sciences* **28**, 69-74, doi:10.1016/S0968-0004(03)00004-5  
495 (2003).
- 496 24 Kirino, Y. *et al.* Arginine methylation of Piwi proteins catalysed by dPRMT5 is required for Ago3  
497 and Aub stability. *Nature cell biology* **11**, 652-658, doi:10.1038/ncb1872 (2009).
- 498 25 Liu, H. *et al.* Structural basis for methylarginine-dependent recognition of Aubergine by Tudor.  
499 *Genes & development* **24**, 1876-1881, doi:10.1101/gad.1956010 (2010).
- 500 26 Xiol, J. *et al.* RNA clamping by Vasa assembles a piRNA amplifier complex on transposon  
501 transcripts. *Cell* **157**, 1698-1711, doi:10.1016/j.cell.2014.05.018 (2014).
- 502 27 Patil, V. S. & Kai, T. Repression of retroelements in *Drosophila* germline via piRNA pathway by the  
503 Tudor domain protein Tejas. *Curr Biol* **20**, 724-730, doi:10.1016/j.cub.2010.02.046 (2010).
- 504 28 Handler, D. *et al.* A systematic analysis of *Drosophila* TUDOR domain-containing proteins identifies  
505 Vreteno and the Tdrd12 family as essential primary piRNA pathway factors. *EMBO J* **30**, 3977-  
506 3993, doi:10.1038/emboj.2011.308 (2011).
- 507 29 Saito, K. *et al.* Roles for the Yb body components Armitage and Yb in primary piRNA biogenesis in  
508 *Drosophila*. *Genes & development* **24**, 2493-2498, doi:10.1101/gad.1989510 (2010).
- 509 30 Olivieri, D., Sykora, M. M., Sachidanandam, R., Mechtler, K. & Brennecke, J. An in vivo RNAi assay  
510 identifies major genetic and cellular requirements for primary piRNA biogenesis in *Drosophila*.  
511 *EMBO J* **29**, 3301-3317, doi:10.1038/emboj.2010.212 (2010).
- 512 31 Zamparini, A. L. *et al.* Vreteno, a gonad-specific protein, is essential for germline development and  
513 primary piRNA biogenesis in *Drosophila*. *Development* **138**, 4039-4050, doi:10.1242/dev.069187  
514 (2011).
- 515 32 Soding, J., Biegert, A. & Lupas, A. N. The HHpred interactive server for protein homology detection  
516 and structure prediction. *Nucleic acids research* **33**, W244-248, doi:10.1093/nar/gki408 (2005).
- 517 33 Finn, R. D. *et al.* HMMER web server: 2015 update. *Nucleic acids research* **43**, W30-38,  
518 doi:10.1093/nar/gkv397 (2015).
- 519 34 Di Tommaso, P. *et al.* T-Coffee: a web server for the multiple sequence alignment of protein and  
520 RNA sequences using structural information and homology extension. *Nucleic acids research* **39**,  
521 W13-17, doi:10.1093/nar/gkr245 (2011).
- 522 35 Hahn, C. S., Hahn, Y. S., Braciale, T. J. & Rice, C. M. Infectious Sindbis virus transient expression  
523 vectors for studying antigen processing and presentation. *Proceedings of the National Academy*  
524 *of Sciences of the United States of America* **89**, 2679-2683 (1992).
- 525 36 Saleh, M. C. *et al.* Antiviral immunity in *Drosophila* requires systemic RNA interference spread.  
526 *Nature* **458**, 346-350, doi:10.1038/nature07712 (2009).
- 527 37 Pall, G. S. & Hamilton, A. J. Improved northern blot method for enhanced detection of small RNA.  
528 *Nat Protoc* **3**, 1077-1084, doi:10.1038/nprot.2008.67 (2008).
- 529 38 van Cleef, K. W. *et al.* Mosquito and *Drosophila* entomobirnaviruses suppress dsRNA- and siRNA-  
530 induced RNAi. *Nucleic acids research* **42**, 8732-8744, doi:10.1093/nar/gku528 (2014).

- 531 39 Smits, A. H., Jansen, P. W., Poser, I., Hyman, A. A. & Vermeulen, M. Stoichiometry of chromatin-  
532 associated protein complexes revealed by label-free quantitative mass spectrometry-based  
533 proteomics. *Nucleic acids research* **41**, e28, doi:10.1093/nar/gks941 (2013).
- 534 40 Rappsilber, J., Mann, M. & Ishihama, Y. Protocol for micro-purification, enrichment, pre-  
535 fractionation and storage of peptides for proteomics using StageTips. *Nat Protoc* **2**, 1896-1906,  
536 doi:10.1038/nprot.2007.261 (2007).
- 537 41 Ishizu, H., Siomi, H. & Siomi, M. C. Biology of PIWI-interacting RNAs: new insights into biogenesis  
538 and function inside and outside of germlines. *Genes & development* **26**, 2361-2373,  
539 doi:10.1101/gad.203786.112 (2012).
- 540 42 Clough, E., Moon, W., Wang, S., Smith, K. & Hazelrigg, T. Histone methylation is required for  
541 oogenesis in *Drosophila*. *Development* **134**, 157-165, doi:10.1242/dev.02698 (2007).
- 542 43 Girardi, E. *et al.* Histone-derived piRNA biogenesis depends on the ping-pong partners Piwi5 and  
543 Ago3 in *Aedes aegypti*. *Nucleic acids research*, doi:10.1093/nar/gkw1368 (2017).
- 544 44 Maringer, K. *et al.* Proteomics informed by transcriptomics for characterising active transposable  
545 elements and genome annotation in *Aedes aegypti*. *BMC genomics* **18**, 101, doi:10.1186/s12864-  
546 016-3432-5 (2017).
- 547 45 Matthews, B. J., Dudchenko, O. Improved *Aedes aegypti* mosquito reference genome assembly  
548 enables biological discovery and vector control. *BioRxiv*, doi:https://doi.org/10.1101/240747  
549 (2017).
- 550 46 Gamsjaeger, R., Liew, C. K., Loughlin, F. E., Crossley, M. & Mackay, J. P. Sticky fingers: zinc-fingers  
551 as protein-recognition motifs. *Trends in biochemical sciences* **32**, 63-70,  
552 doi:10.1016/j.tibs.2006.12.007 (2007).
- 553 47 Calabretta, S. & Richard, S. Emerging Roles of Disordered Sequences in RNA-Binding Proteins.  
554 *Trends in biochemical sciences* **40**, 662-672, doi:10.1016/j.tibs.2015.08.012 (2015).
- 555 48 Schnettler, E., Sreenu, V. B., Mottram, T. & McFarlane, M. Wolbachia restricts insect-specific  
556 flavivirus infection in *Aedes aegypti* cells. *The Journal of general virology* **97**, 3024-3029,  
557 doi:10.1099/jgv.0.000617 (2016).
- 558 49 Aguiar, E. R. G. *et al.* Sequence-independent characterization of viruses based on the pattern  
559 of viral small RNAs produced by the host. *Nucleic acids research* **43**, 6191-6206,  
560 doi:10.1093/nar/gkv587 (2015).
- 561 50 Gammon, D. B. & Mello, C. C. RNA interference-mediated antiviral defense in insects. *Curr Opin*  
562 *Insect Sci* **8**, 111-120, doi:10.1016/j.cois.2015.01.006 (2015).
- 563 51 Blair, C. D. & Olson, K. E. The role of RNA interference (RNAi) in arbovirus-vector interactions.  
564 *Viruses* **7**, 820-843, doi:10.3390/v7020820 (2015).
- 565 52 Malone, C. D. *et al.* Specialized piRNA pathways act in germline and somatic tissues of the  
566 *Drosophila* ovary. *Cell* **137**, 522-535, doi:10.1016/j.cell.2009.03.040 (2009).
- 567 53 Li, C. *et al.* Collapse of germline piRNAs in the absence of Argonaute3 reveals somatic piRNAs in  
568 flies. *Cell* **137**, 509-521, doi:10.1016/j.cell.2009.04.027 (2009).
- 569 54 Sato, K. *et al.* Krimper Enforces an Antisense Bias on piRNA Pools by Binding AGO3 in the  
570 *Drosophila* Germline. *Mol Cell* **59**, 553-563, doi:10.1016/j.molcel.2015.06.024 (2015).
- 571 55 Webster, A. *et al.* Aub and Ago3 Are Recruited to Nuage through Two Mechanisms to Form a Ping-  
572 Pong Complex Assembled by Krimper. *Mol Cell* **59**, 564-575, doi:10.1016/j.molcel.2015.07.017  
573 (2015).
- 574 56 Gainetdinov, I., Colpan, C., Arif, A., Cecchini, K., Zamore, P.D. *et al.* A single mechanism of  
575 biogenesis, initiated and directed by PIWI proteins, explains piRNA production in most animals.  
576 *BioRxiv*, doi:<http://dx.doi.org/10.1101/261545> (2018).
- 577 57 Marques, J. T. *et al.* Functional specialization of the small interfering RNA pathway in response to  
578 virus infection. *PLoS Pathog* **9**, e1003579, doi:10.1371/journal.ppat.1003579 (2013).

- 579 58 Hartig, J. V. & Forstemann, K. Loqs-PD and R2D2 define independent pathways for RISC generation  
580 in *Drosophila*. *Nucleic acids research* **39**, 3836-3851, doi:10.1093/nar/gkq1324 (2011).
- 581 59 Wang, W. *et al.* Slicing and Binding by Ago3 or Aub Trigger Piwi-Bound piRNA Production by  
582 Distinct Mechanisms. *Mol Cell* **59**, 819-830, doi:10.1016/j.molcel.2015.08.007 (2015).
- 583 60 Reuter, M. *et al.* Loss of the Mili-interacting Tudor domain-containing protein-1 activates  
584 transposons and alters the Mili-associated small RNA profile. *Nat Struct Mol Biol* **16**, 639-646,  
585 doi:10.1038/nsmb.1615 (2009).
- 586 61 Campbell, C. L., Black, W. C. t., Hess, A. M. & Foy, B. D. Comparative genomics of small RNA  
587 regulatory pathway components in vector mosquitoes. *BMC genomics* **9**, 425, doi:10.1186/1471-  
588 2164-9-425 (2008).
- 589 62 Lewis, S. H., Salmela, H. & Obbard, D. J. Duplication and Diversification of Dipteran Argonaute  
590 Genes, and the Evolutionary Divergence of Piwi and Aubergine. *Genome Biol Evol* **8**, 507-518,  
591 doi:10.1093/gbe/evw018 (2016).
- 592 63 Akbari, O. S. *et al.* The developmental transcriptome of the mosquito *Aedes aegypti*, an invasive  
593 species and major arbovirus vector. *G3 (Bethesda)* **3**, 1493-1509, doi:10.1534/g3.113.006742  
594 (2013).

595
